# ADVANCES IN CALCULUS OF VARIATIONS

Rate card no. 1/2009

**Print run:** 200 copies  
**Printing process:** Offset  
**Artwork requirements:** PDF-Files directly:  
**AZ Druck und Datentechnik GmbH**  
ISDN: + 49 (831) 206-473 Leonardo  
e-mail: [degruyter@az-druck.de](mailto:degruyter@az-druck.de)  
Datenträger an: AZ Druck und Datentechnik GmbH  
Heisinger Straße 16, D-87437 Kempten (Allgäu)  
Tel.: 0831 / 206 - 185  
Fax.: 0831 / 206 - 369

**Please fax a copy of your ad together with the name of the file to the printing house.**

**Please send your advertisement order and a copy of your ad to the publisher.**

**Dates of publication:** 4 issues per year  
**Copy deadlines:** on request  
**Format of the journal:** 240 mm height x 170 mm width  
**Advertising rates:**  
Full page 190 mm height x 125 mm width 300 EURO  
Half page 93 mm height x 125 mm width or  
190 mm height x 62 mm width 170 EURO  
**Series discounts:** 3 insertions 3%; 6 insertions 5%  
**Inserts:** on request  
**Terms of payment:** net - on receipt of invoice  
**Bankers:** Postbank Berlin, Acct. no. 103 07-108 (BLZ 100 100 10)  
Berliner Bank AG, Acct. no. 32 07523 500 (BLZ 100 200 00)  
The publisher reserves the right to refuse advertisements.  
**Orders and enquiries to:** Dietlind Makswitat  
Advertising Coordinator.  
Walter de Gruyter GmbH & Co.  
Genthiner Straße 13  
D-10785 Berlin  
Tel (+49) 30 - 260 05-131; Fax (+49) 30 - 260 05-322  
e-mail: [anzeigen@degruyter.com](mailto:anzeigen@degruyter.com)
